# Supplementary material for: Ag decoration on Na2Ti3O7 nanowires for improved SERS and PHE performance
Source: Royal Society of Chemistry journal article supplement (doi:10.1039/d3nr03994c), 2023-01-01
Supplement: d3nr03994c1.pdf [file d3nr03994c1.pdf]

## **Ag Decoration on Na<sub>2</sub>Ti<sub>3</sub>O<sub>7</sub> Nanowires for Improved SERS and PHE Performance**

Lei Chen,<sup>a</sup> Yang Jin,<sup>\*b</sup> Shuang Guo,<sup>c</sup> Eungyeong Park,<sup>c</sup> Yunfei Xie<sup>\*b</sup> and Young Mee Jung<sup>\*c</sup>

<sup>a</sup> *School of Materials Science and Engineering, Jilin Jianzhu University, Changchun 130118, China.*

<sup>b</sup> *School of Food Science and Technology, Jiagnan University, Wuxi, Jiangsu 214122, China.*

<sup>c</sup> *Department of Chemistry, Institute for Molecular Science and Fusion Technology, Kangwon National University, Chunchon 24341, Korea.*

\*To whom correspondence should be addressed.

[jy1165254033@163.com](mailto:jy1165254033@163.com), [xieyunfei@jiangnan.edu.cn](mailto:xieyunfei@jiangnan.edu.cn), [ymjung@kangwon.ac.kr](mailto:ymjung@kangwon.ac.kr)

**Table S1.** Assignments of SERS bands of MBA

| Raman shift (cm <sup>-1</sup> ) |        | Band assignments <sup>1</sup>                       |
|---------------------------------|--------|-----------------------------------------------------|
| 633 nm                          | 514 nm |                                                     |
| 999                             | 998    | Non-totally symmetric $\nu(\text{CC})$ , $b_2$      |
| 1013                            | 1012   | Non-totally symmetric $\nu(\text{CC})$ , $b_2$      |
| 1076                            | 1077   | In-plane ring breathing + $\nu(\text{C-S})$ , $a_1$ |
| 1138                            |        | $\nu(\text{CH})$ , $b_2$                            |
| 1182                            | 1181   | $\nu(\text{CH})$ , $a_1$                            |
| 1365                            | 1362   | Asymmetric $\nu(\text{COO}^-)$                      |
| 1586                            | 1586   | Totally symmetric $\nu(\text{CC})$ , $a_1$          |

$\nu$ , stretching;  $\beta$ , bending. For ring vibrations, the corresponding vibrational modes of benzene and the symmetry species under  $C_{2v}$  symmetry are indicated, where  $a_1$  and  $b_2$  represent totally and non-totally symmetric vibrational modes of the molecules, respectively.

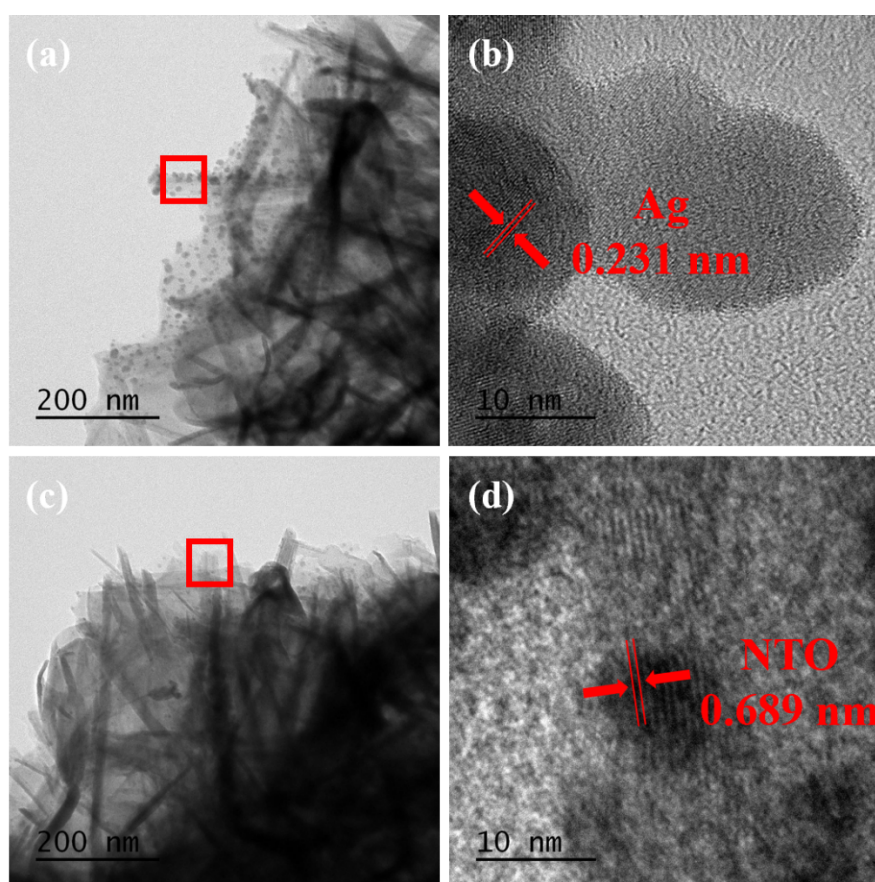**Fig. S1.** (a), (c) High-magnification TEM images and (b), (d) the lattice spacings of Ag-NTO nanowires.

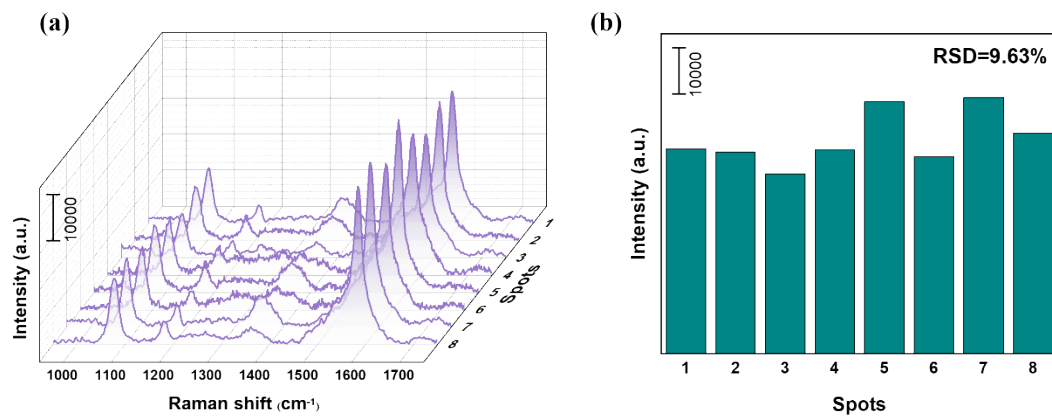

**Fig. S2.** (a) SERS spectrum of  $10^{-3}$  M MBA adsorbed on Ag-NTO-3 obtained with 514 nm excitation light. (b) RSD of the band intensity at  $1591\text{ cm}^{-1}$ .

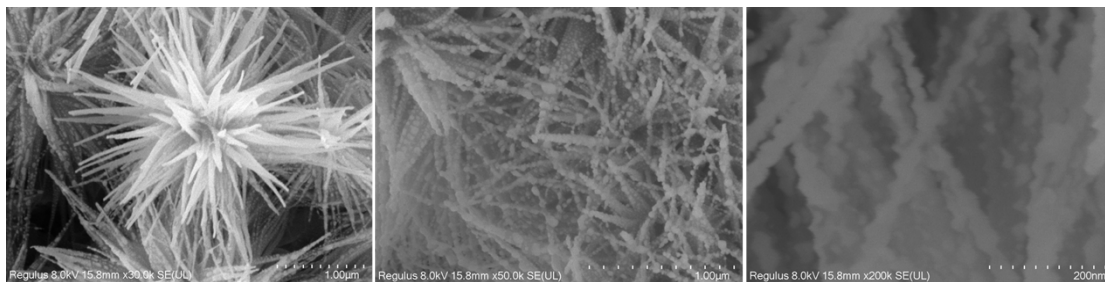

**Fig. S3.** SEM images of sea urchin-shaped nanostructure after four PHE cycles.

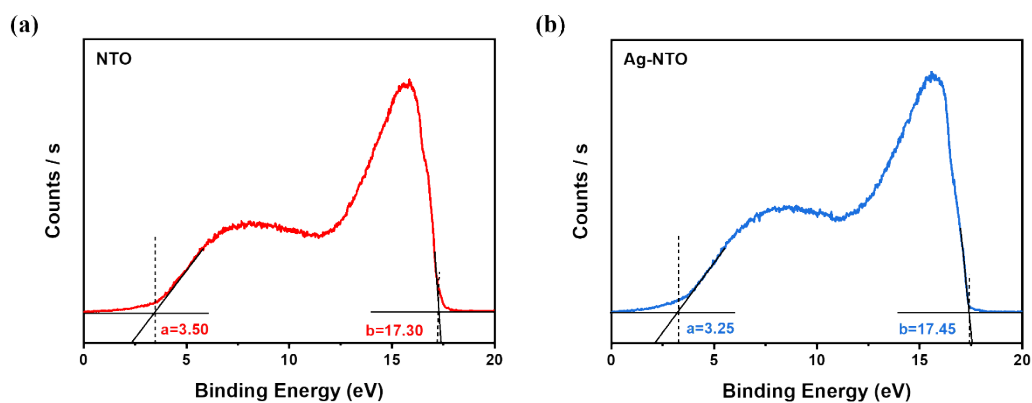

**Fig. S4.** UPS spectra of (a) NTO and (b) Ag-NTO.

**CB and VB Energy Determination.** The band gap positions of the Ag/ITO systems were calculated according to the following equations:

$$W_F = hv - \Delta E \quad (1)$$

$$VB = W_F + b \quad (2)$$

$$CB = VB - E_g \quad (3)$$

where,  $hv$  is 21.22 eV,  $\Delta E$  is the tangent value  $a$  in the graph, and the values  $a$  and  $b$  are both obtained by taking the tangent. The VB levels of NTO and Ag-NTO can be calculated as 7.42 and 7.02 eV (vs. vacuum), respectively. Furthermore, the calculated VB levels are 2.92 and 2.52 eV (vs. NHE), respectively.

## References

1 B. Han, L. Chen, S. Jin, S. Guo, J. Park, H. S. Yoo, J. H. Park, B. Zhao and Y. M. Jung, Modulating Mechanism of the LSPR and SERS in Ag/ITO Film: Carrier Density Effect, *J. Phys. Chem. Lett.*, 2021, **12**, 7612–7618.
